# Supplementary material
Source: Springer Nature journal article supplement (https://www.springermedizin.de/resource/supplementary/12902_2008_55_MOESM3_ESM.pdf/9516138)

# Difference against mean of observed & predicted peak pressure (kPa) for metatarsal one region (mt-1)

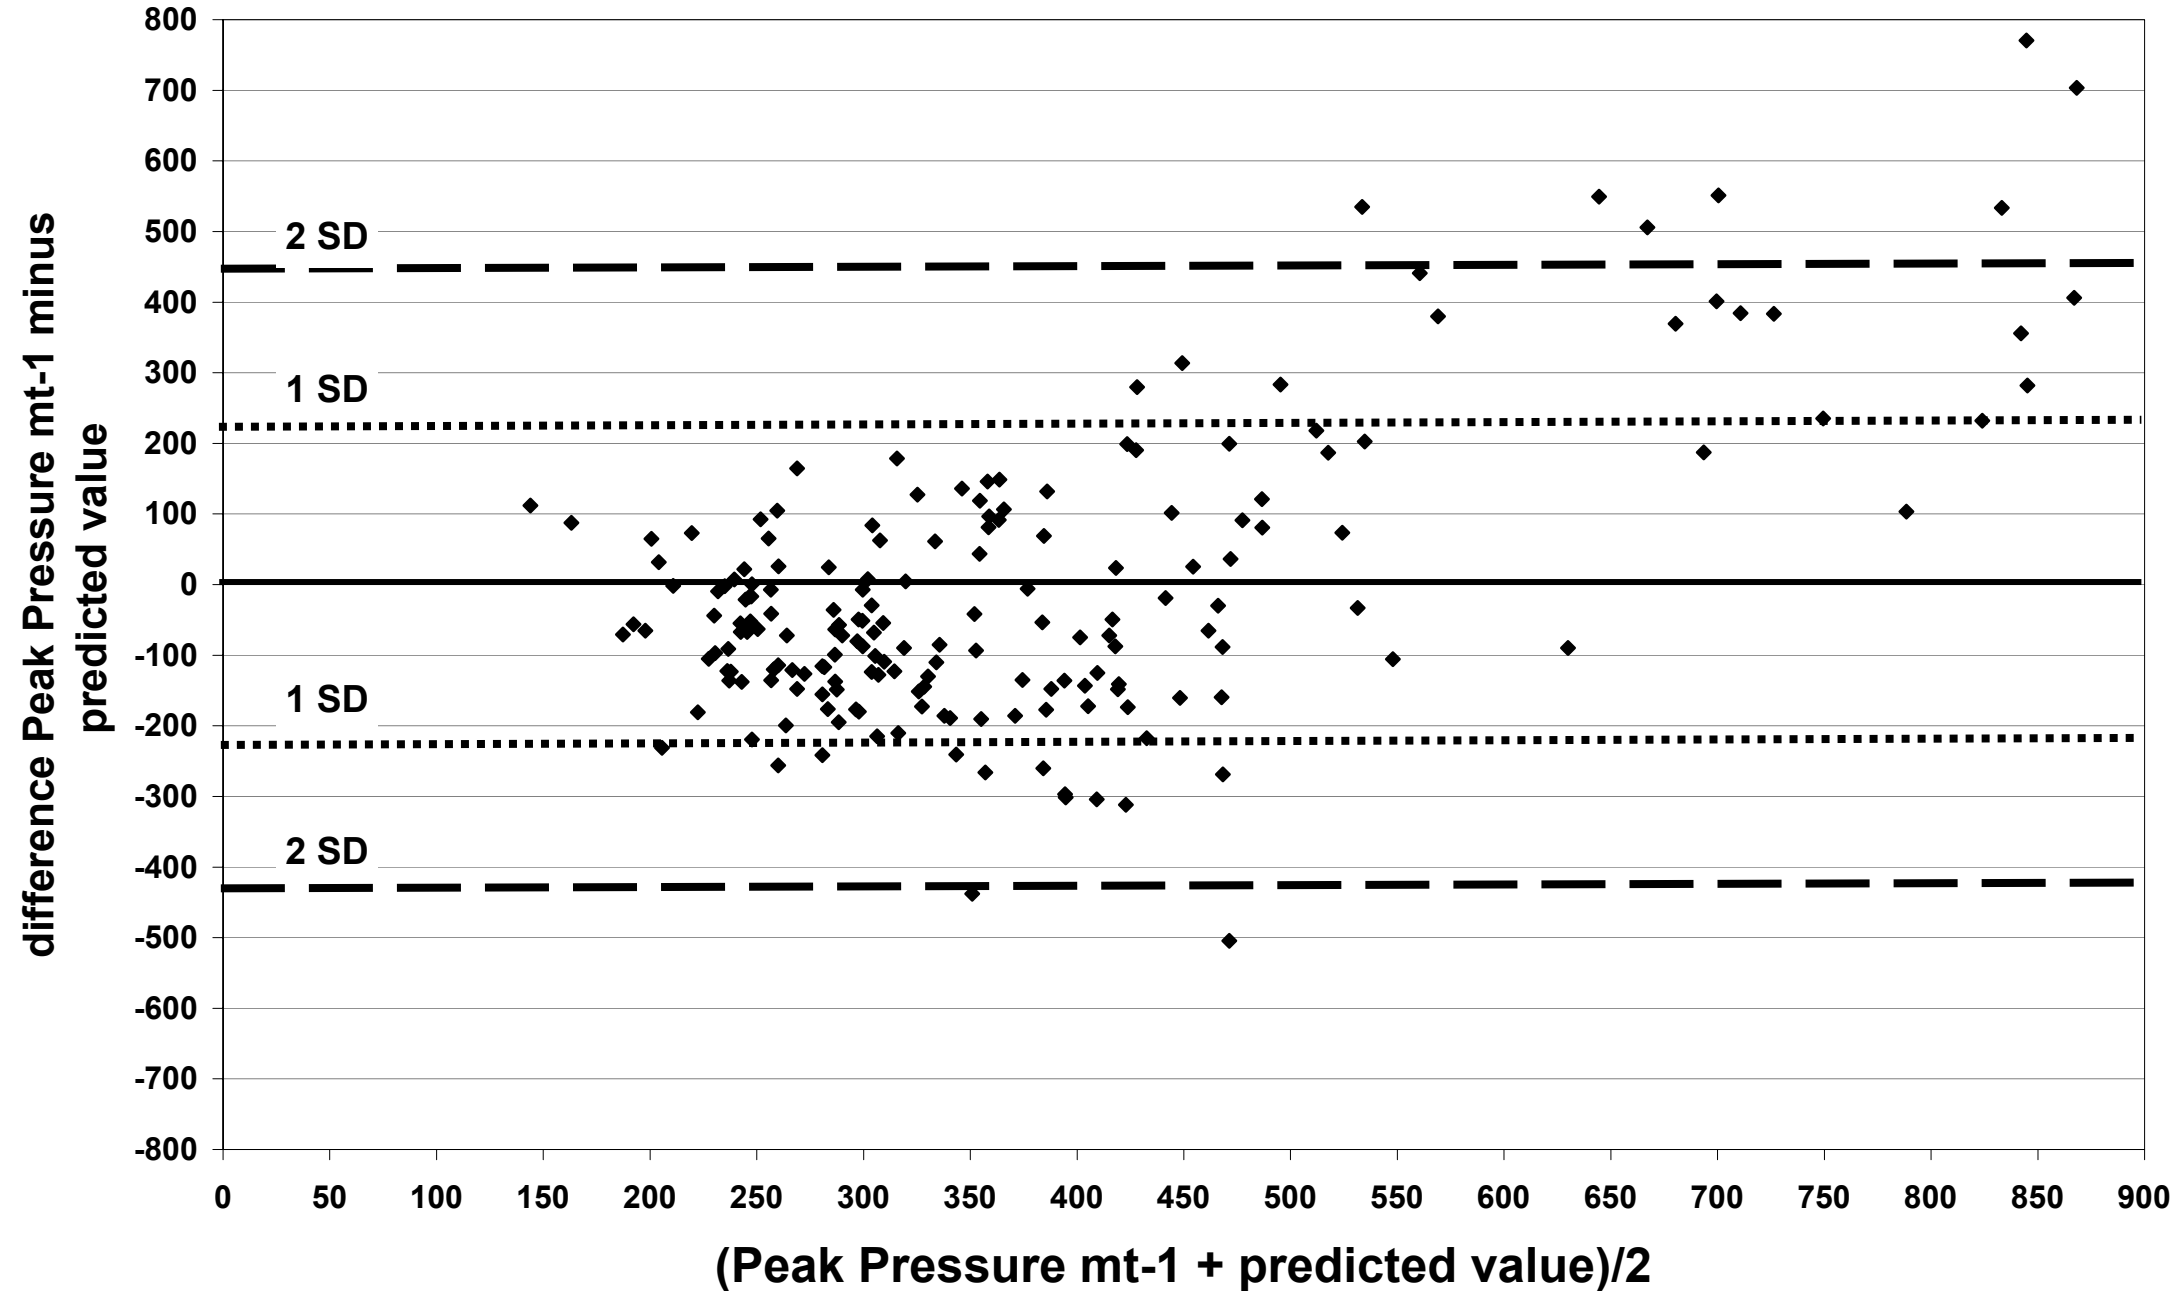

Supplement: MOESM3 [file 9516138]
